# Supplementary material
Source: MDPI journal article supplement (https://www.mdpi.com/2073-4433/13/5/835)
Supplement: s1 [file s1 › atmosphere-1698125-supplementary.pdf]

## Supplementary Materials:

*Sunil Paul M. Menacherry, Usha K. Aravind and Charuvila T. Aravindakumar*

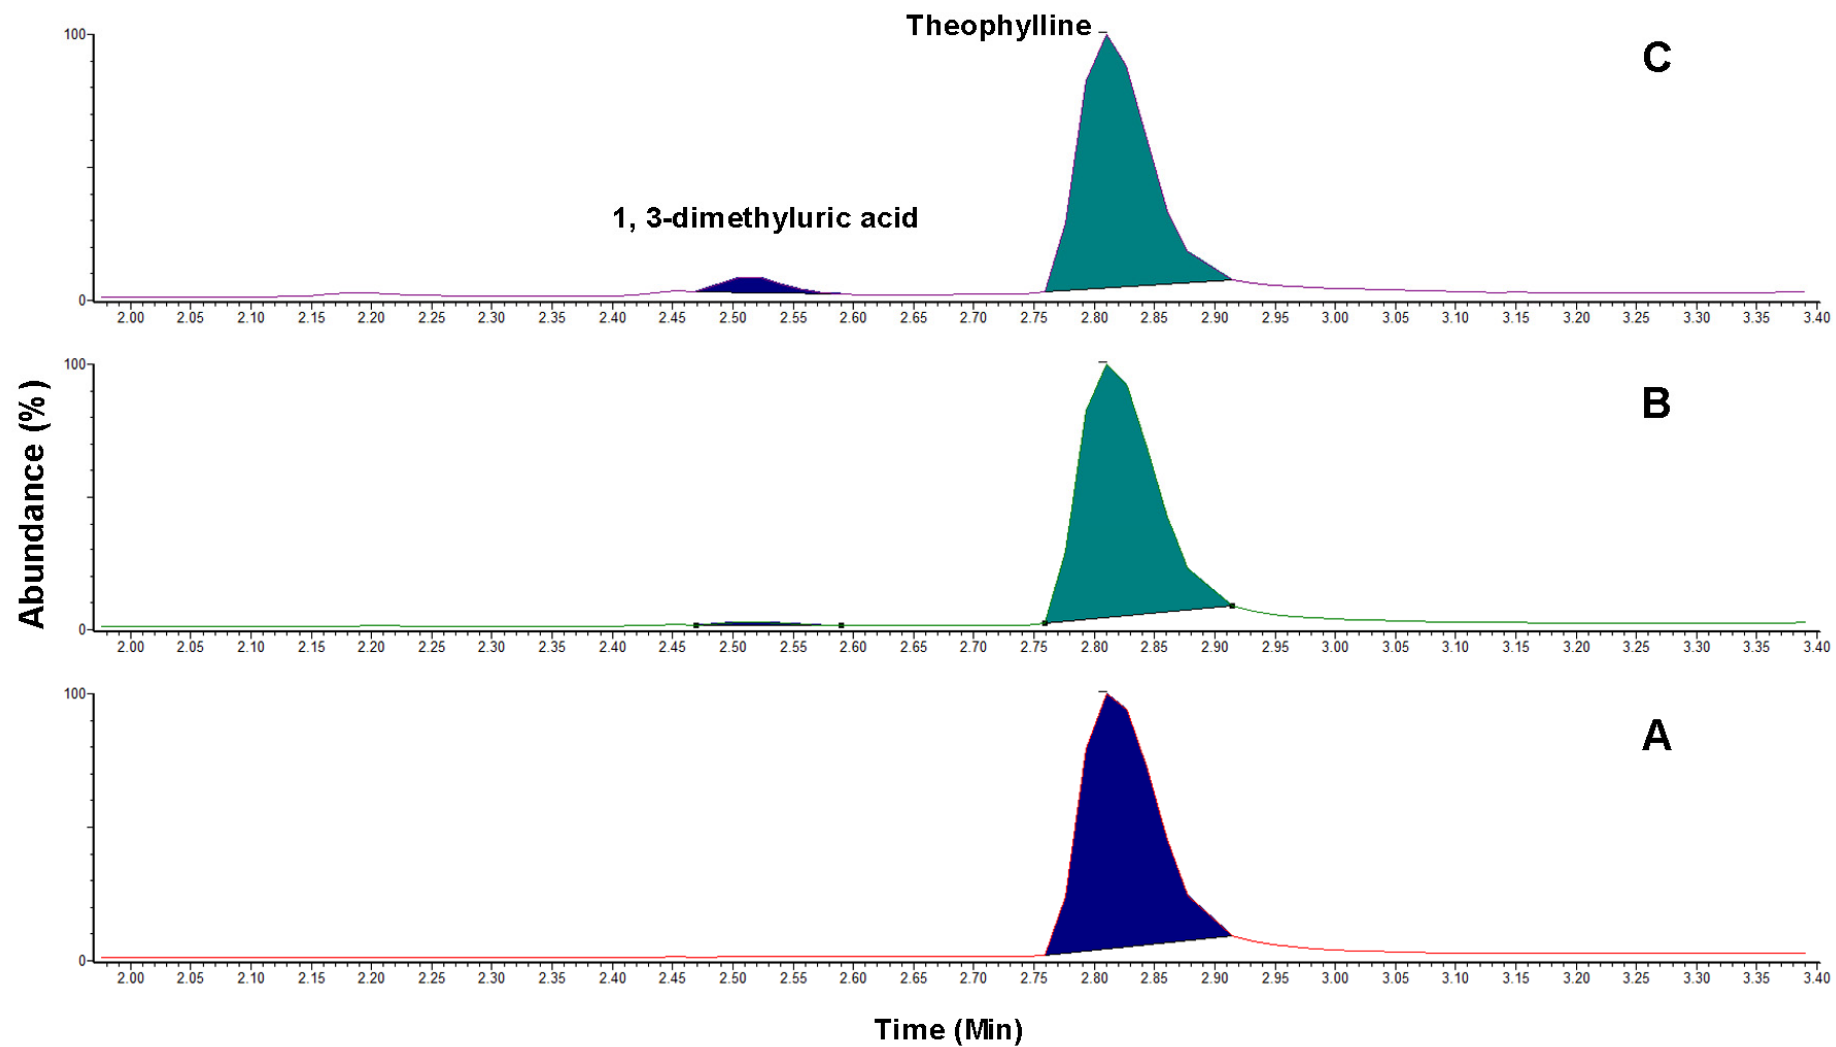

**Figure S1:** Total ion chromatogram of theophylline in the positive ionization mode recorded after 1 (A), 2 (B), and 4 (C) minutes of irradiation.

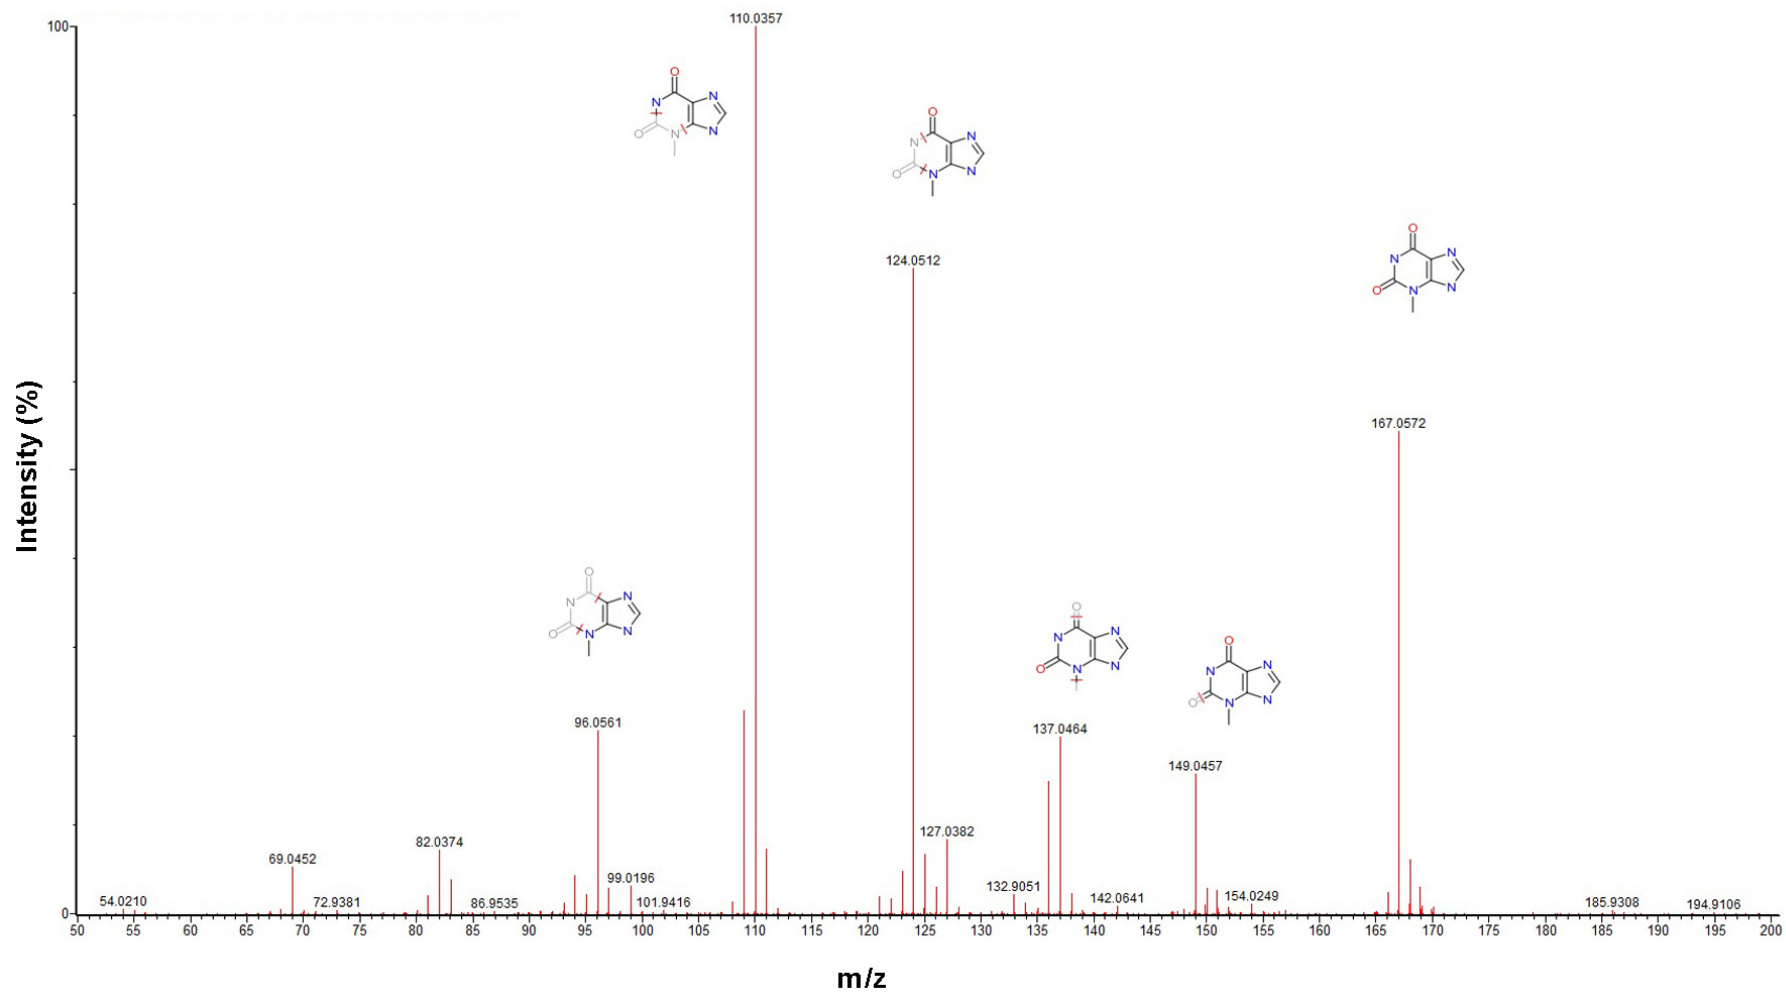

**Figure S2:** MS/MS spectrum of 3-methylxanthine recorded in the positive ionization mode.
